# Supplementary material for: Constrained Total Generalized p-Variation Minimization for Few-View X-Ray Computed Tomography Image Reconstruction
Source: PLoS One. 2016 Feb 22;11(2):e0149899. doi: 10.1371/journal.pone.0149899 (PMC4764011; doi:10.1371/journal.pone.0149899)
Supplement: S1 Appendix — (DOC) [file pone.0149899.s001.doc]

**S1 Appendix. Implementations of TV-ADM, TpV-ADM, and TGV-ADM algorithms.**

**1. TV-ADM algorithm**

To solve the linear system of Eq. (4), a constrained TV minimization model for describing the intensity variations of an image is used as follows:

(A1)

where is a data-error tolerance parameter.

By introducing a vector , we consider the following constrained minimization problem, which is equivalent to (A1):

(A2)

Next, we reformulate the constrained minimization problem as an unconstrained optimization task through an augmented Lagrangian method. The augmented Lagrangian energy associated to (A2) is defined as:

(A3)

where are Lagrange multipliers, and are positive constants used to balance the terms.

The solution to minimize can be approximated efficiently by the alternating direction method; at each iteration, an approximate minimizer is found with respect to the variables and  and the Lagrange multipliers are updated alternately. Herein, we simply state the general scheme of TV-ADM in Algorithm A1.

| **Algorithm A1**: TV-ADM algorithm |
| --- |
| Input , initialize , and .  **While** “not converged,” **Do**  (1) -subproblem:    (2) -subproblem:        (3) Update noise term by:    (4) Update multipliers by:    (5).  **End Do**  Obtain reconstruction result:. |

**2. TpV-ADM algorithm**

The constrained TpV minimization model for CT image reconstruction can be described as follows:

(A4)

The theoretical derivation of the TpV-ADM algorithm is similar to TV-ADM algorithm except the derivation of z-subproblem. z-subproblem is solved by generalized p-shrinkage mappings. The general TpV-ADM algorithm scheme can be expressed as follows (List Algorithm A2).

| **Algorithm A2**: TpV-ADM algorithm |
| --- |
| Input , initialize , and .  **While** “not converged,” **Do**  (1) -subproblem:    (2) -subproblem:        (3) Update noise term by:    (4) Update multipliers by:    (5).  **End Do**  Obtain reconstruction result:. |

**3. TGV-ADM algorithm**

The constrained TGV minimization model for CT image reconstruction can be described as follows:

(A5)

The general TGV-ADM algorithm scheme can be expressed as follows (List Algorithm A3). For purposes of comparison, the Fourier-based solutions are also used in the implementations of -subproblem and -subproblem.

| **Algorithm A3**: TGV-ADM framework |
| --- |
| Input, initialize, and. Given :  **While** “not converged,” **Do**  (1) Update by    (2) Update by    (3) Update by    (4) Update by    (5) Update by      (6) Update multipliers by    (7).  **End Do**  Obtain reconstruction result:. |
